# Supplementary material
Source: PubMed Central journal article supplement (PMC5350564)

# Figure 2

## B - Immunoblotting

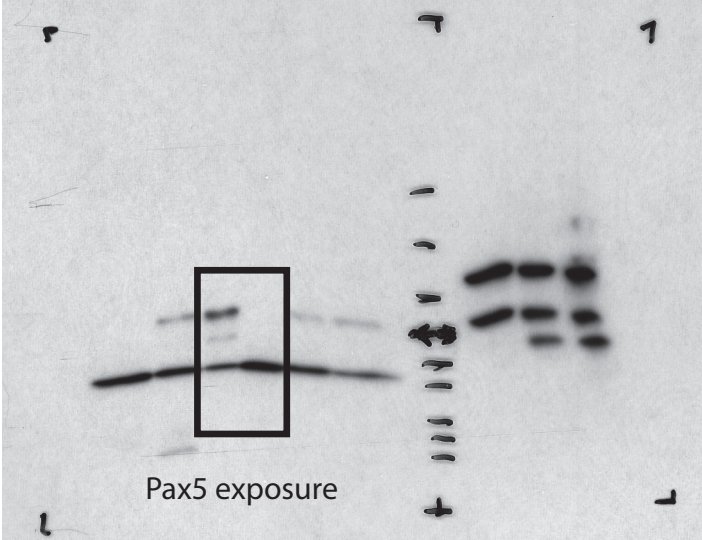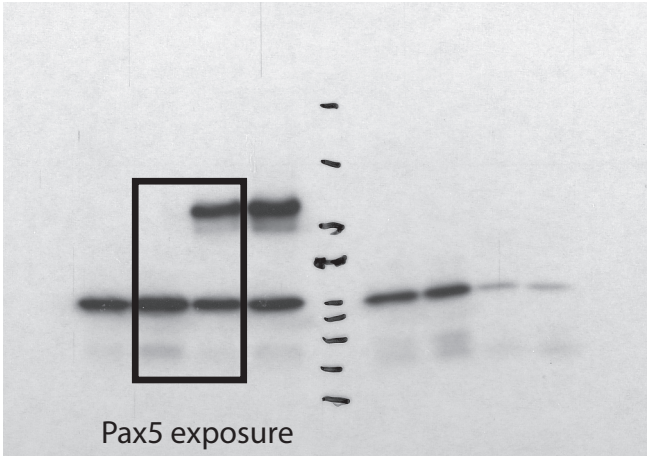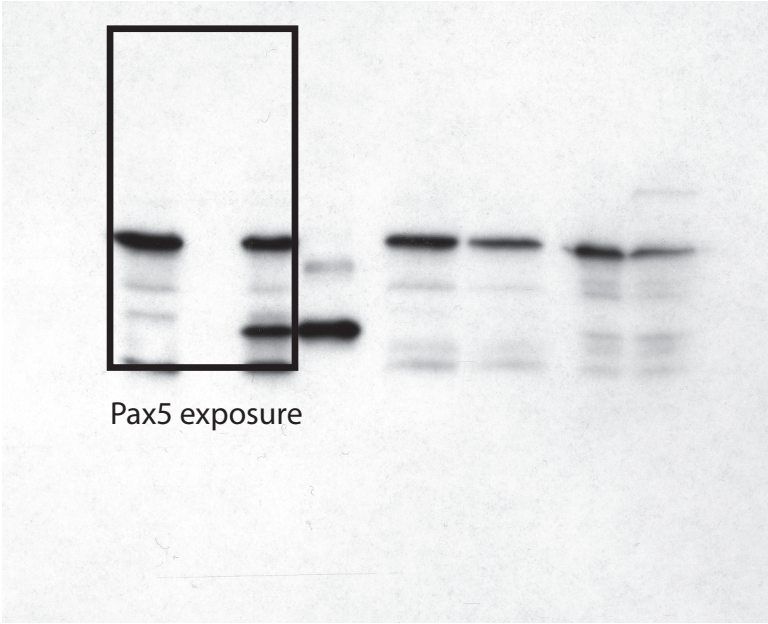

Supplement: EMBJ-36-718-s008.pdf [file EMBJ-36-718-s008.pdf]
